# Supplementary material for: Nanorod-constructed porous Co3O4 nanowires: highly sensitive sensors for the detection of hydrazine
Source: Royal Society of Chemistry journal article supplement (doi:10.1039/c4an02111h), 2015-01-01
Supplement: c4an02111h1.pdf [file c4an02111h1.pdf]

## Supporting information

### **Nanorod-constructed porous Co<sub>3</sub>O<sub>4</sub> nanowires: Highly sensitive sensor for detection of hydrazine**

*Jie Zhang, Wenbin Gao, Meiling Dou\*, Feng Wang\*, Jingjun Liu, Zhilin Li, and  
Jing Ji*

Resource Engineering, Beijing Key Laboratory of Electrochemical Process and Technology for Materials, Beijing University of Chemical Technology, Beijing 100029, PR China.

Fax: 86-10-64411996; Tel: 86-10-64411996; E-mail: wangf@mail.buct.edu.cn; douml@mail.buct.edu.cn;

Fig. S1 shows the typical first and second CVs in 0.1 M NaOH with different hydrazine concentrations at 20 mV s<sup>-1</sup>. When hydrazine was added to the electrolyte, the response current changed. It is observed that the anodic peak current increased with more concentrated hydrazine, especially for the CoOOH → CoO<sub>2</sub> process, while the cathodic current of CoO<sub>2</sub> → CoOOH decreased. This phenomenon is ascribed to the chemical reaction of hydrazine with CoO<sub>2</sub>, which generates CoOOH (Co(III)) and N<sub>2</sub>. Such process proves an Electrochemical–Chemical (EC) mechanism. The hydrazine detection by the Co<sub>3</sub>O<sub>4</sub> NWs electrode can therefore be illustrated as shown in Fig. S2.

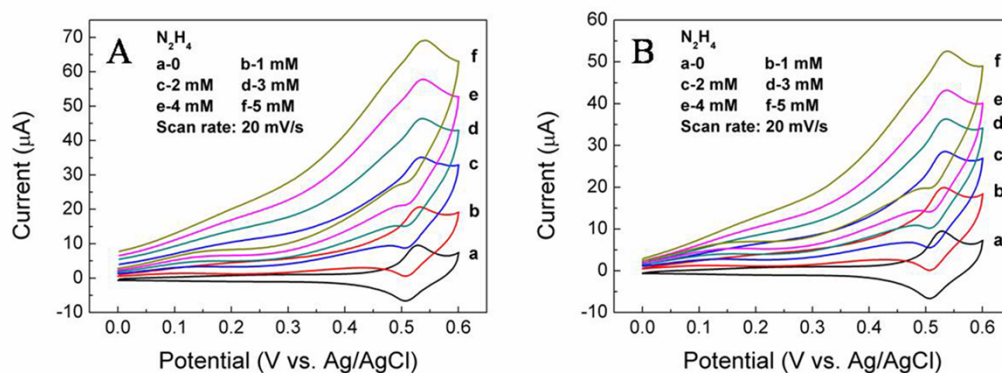

Fig. S1 The first (A) and second (B) CVs of  $\text{Co}_3\text{O}_4$  NWs in 0.1 M NaOH with different hydrazine concentrations at  $20 \text{ mV s}^{-1}$ .

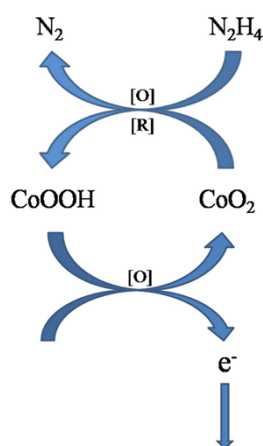

Fig. S2 The scheme of the principle of  $\text{Co}_3\text{O}_4$  NWs for hydrazine detection

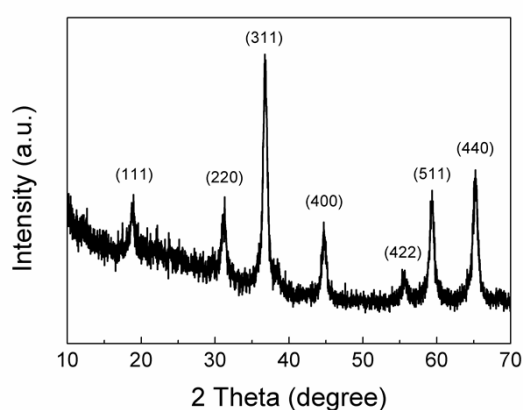

Fig. S3 XRD pattern of  $\text{Co}_3\text{O}_4$  NPs

Fig. S3 shows the XRD pattern of  $\text{Co}_3\text{O}_4$  NPs. All the diffractions of  $\text{Co}_3\text{O}_4$  NPs correspond to the characteristics of standard  $\text{Co}_3\text{O}_4$ . The lattice fringe of 0.47 nm is assigned to the (111) plane of  $\text{Co}_3\text{O}_4$  as shown in Fig. S4 which displays uniformly

dispersed nanoparticles of  $\text{Co}_3\text{O}_4$  with the average particle size of ca. 6 nm.

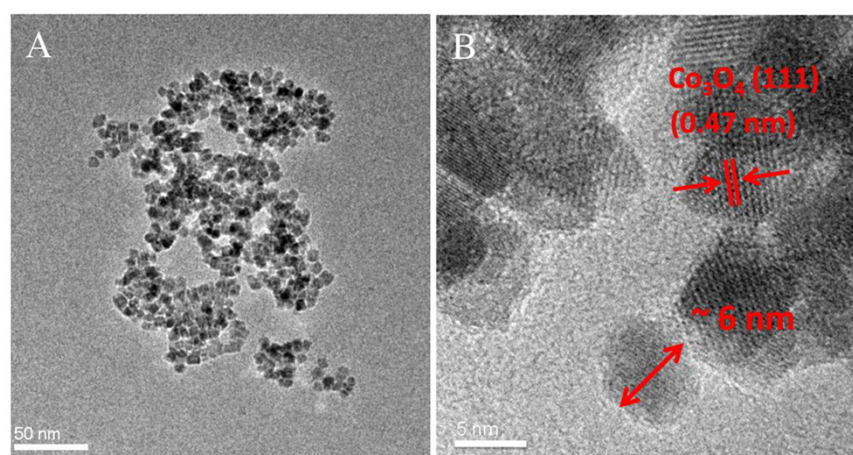

Fig. S4 TEM images of  $\text{Co}_3\text{O}_4$  NPs (A, low magnification; B, high magnification)
